1 **Resource Paper**

2

3 **Comprehensive catalog of dendritically localized mRNA isoforms from sub-**  
4 **cellular sequencing of single mouse neurons**

5

6

7

8 Sarah A. Middleton<sup>1,4</sup>

9

10 James Eberwine<sup>2</sup>

11

12 Junhyong Kim<sup>1,3,\*</sup>

13

14

15 <sup>1</sup>Graduate Program in Genomics and Computational Biology

16 Biomedical Graduate Studies, University of Pennsylvania

17 160 BRB II/III - 421 Curie Blvd.

18 Philadelphia, PA 19104-6064

19

20 <sup>2</sup>Department of Systems Pharmacology and Translational Therapeutics

21 Perelman School of Medicine, University of Pennsylvania

22 829 BRB II/III

23 421 Curie Blvd

24 Philadelphia PA 19104

25

26 <sup>3</sup>Department of Biology

27 University of Pennsylvania

28 415 S. University Ave

29 Philadelphia, PA 19104

30

31 <sup>4</sup>Current Address:

32 Computational Biology, Target Sciences

33 GlaxoSmithKline R&D

34 1250 S. Collegeville Road

35 Collegeville, PA 19426

36

37 \*To-whom correspondence should be addressed

38

39 **Abstract** (150 words)

40 RNA localization to neuronal dendrites is critical step for long-lasting synaptic  
41 potentiation, but there is little consensus regarding which RNAs are localized and the role of  
42 alternative isoforms in localization. Using independent RNA-sequencing from soma and  
43 dendrites of the same neuron, we deeply profiled the sub-cellular transcriptomes to assess the  
44 extent and variability of dendritic RNA localization in individual hippocampal neurons,  
45 including an assessment of differential localization of alternative 3'UTR isoforms. We identified  
46 2,225 dendritic RNAs, including 298 cases of 3'UTR isoform-specific localization. We  
47 extensively analyzed the localized RNAs for potential localization motifs, finding that B1 and B2  
48 SINE elements are up to 5.7 times more abundant in localized RNA 3'UTRs than non-localized,  
49 and also functionally characterized the localized RNAs using protein structure analysis. Finally,  
50 we integrate our list of localized RNAs with the literature to provide a comprehensive list of  
51 known dendritically localized RNAs as a resource.

52

53 **Introduction**

54

55 Neurons require local protein synthesis within the dendrites to produce long-lasting synaptic  
56 potentiation (Aakalu et al. 2001; Eberwine et al. 2001; Job and Eberwine 2001). In order for this  
57 local synthesis to occur, mRNAs must first be transported to the dendrites. Although RNA  
58 localization and local translation have been studied for over 20 years, including initial sanger  
59 sequencing of isolated single dendrite RNA (Miyashiro, Dichter, and Eberwine 1994; Crino and  
60 Eberwine 1996), a more detailed and thorough analysis is required to generate a consensus set of  
61 dendritically localized RNAs. Surprisingly, the advent of high-throughput sequencing has not

62 greatly improved matters: of three recent RNA-seq studies of dendritically localized RNA  
63 (Cajigas et al. 2012; Ainsley et al. 2014; Taliaferro et al. 2016), only 1% of the identified RNAs  
64 overlapped between all three studies (44 of 4,441). Although these differences can be partly  
65 attributed to differences in sample origin, organism, and experimental protocol between each  
66 study, these examples nonetheless point to a need for further studies to understand the full range  
67 and variability of dendritic RNAs.

68       There are several major challenges in profiling the dendritic transcriptome: (1) cleanly  
69 separating the somatic and dendritic compartments so that they can be profiled separately, (2)  
70 differentiating transcript variation (e.g., alternative 3'UTRs) in addition to localization, and (3)  
71 accounting for single cell variation in both somatic expression and dendritic localization. Given  
72 that substantial gene expression heterogeneity has already been observed on the whole-neuron  
73 level (Dueck et al. 2015), it would not be surprising if there is variability of localization across  
74 cells, as was found in an early single dendrite sanger sequencing study (Miyashiro, Dichter, and  
75 Eberwine 1994). In addition, localization variability in neurons may arise from the use of  
76 alternative 3'UTR isoforms. Neurons uniquely express a large number of extended 3'UTR  
77 isoforms that are conserved between human and mouse (Miura et al. 2013), and one possibility is  
78 that a subset of these 3'UTRs contain dendritic localization signals. A few specific examples of  
79 differentially localized 3'UTR isoforms have already been characterized (Miura et al. 2014),  
80 such as BDNF (An et al. 2008; Liao et al. 2012). Taliaferro *et al.* recently surveyed this  
81 phenomenon on a larger scale in brain-derived cell lines and cortical neurons and identified  
82 hundreds of cases of differential localization of alternative 3'UTR isoforms (Taliaferro et al.  
83 2016).

84 Here, we expand upon these earlier studies by performing simultaneous RNA-sequencing of  
85 the somatic and dendritic compartments of single neurons from primary cultures to allow for a  
86 direct contrast of the dendritic transcriptome with its parent soma and to enable the assessment of  
87 heterogeneity of localization across neurons. Using this single neuron sub-cellular sequencing  
88 approach, we identify dendritically enriched RNAs on both the gene and isoform levels,  
89 including several of the recently identified neuron-enriched distal 3'UTR extensions (Miura et al.  
90 2013). We identify a total of 2,225 candidate dendritic RNAs, including 298 that showed  
91 differential localization of 3'UTR isoforms that was consistent across the individual cells. Using  
92 structure- and sequence-based computational techniques, we extensively annotate these dendritic  
93 RNAs to explore their functions and identify possible motifs involved in dendritic targeting.  
94 These new computational models provide a library of testable predictions that will help dissect  
95 the molecular mechanism of dendritic localization and dendritic RNA function. Finally, we  
96 integrate our list of dendritic genes with the current literature, producing a definitive list of  
97 dendritic RNAs that have been observed to date in high-throughput studies.

98

## 99 **Results**

100

### 101 *Identification of dendritically localized RNAs*

102 To compare the RNAs present in dendrites and somas of individual neurons, we manually  
103 separated the dendrites and soma of primary mouse hippocampal neurons using a micropipette  
104 (Miyashiro, Dichter, and Eberwine 1994) and performed RNA-sequencing on each subcellular  
105 fraction such that we obtained the subcellular transcriptomes of the same cell (Fig. 1A). We note  
106 that the axon is generally small at this culture stage (~5% the volume of the dendrites) with a thin

107 gauge ( $< 1\mu\text{M}$ ) and has a flush axon hillock which is easily distinguishable from a dendrites  
108 graded hillock. Thus, we do not expect the axon to be harvested in our procedure, and any axon  
109 that was collected would not make up a large fraction of the isolated dendrite samples. A total of  
110 16 individual neurons were collected (32 soma and dendrite samples). Extracted RNA was  
111 amplified using the aRNA procedure (Morris, Singh, and Eberwine 2011; Van Gelder et al.  
112 1990; Eberwine et al. 1992) and sequenced to an average depth of 25 million reads per sample.  
113 Somas generally contained a wider variety of transcripts than their corresponding dendrites, with  
114 an average of 9,206 and 5,827 genes identified in each compartment respectively. As expected,  
115 the genes represented in the dendrites were largely a subset of the soma-expressed genes of the  
116 same cell (Fig. 1B). All soma and dendrite samples expressed housekeeping genes and neuronal  
117 marker genes at high levels, especially pyramidal cell markers such as *Grin1*, *Mtap2*, and  
118 *Neurod6*, with little expression of other brain cell type markers (Fig. 1C).

119 To identify potentially localized RNAs, we used DESeq2 (Love, Huber, and Anders  
120 2014) to perform a differential expression analysis using a paired design, where soma and  
121 dendrites of the same original cell were directly compared. DESeq2 reported 3,811 genes  
122 significantly more highly expressed in somas and 387 genes significantly higher in dendrites  
123 (FDR corrected  $p \leq 0.05$ ) (Fig. 2A). Given their relatively higher expression in dendrites  
124 compared to soma, these 387 genes are likely to be actively localized, and we therefore refer to  
125 them as localized RNAs. The localized RNAs were strongly enriched for GO terms related to  
126 translation and mitochondria, consistent with previous reports (Ainsley et al. 2014; Francis et al.  
127 2014; Taliaferro et al. 2016), whereas the somatic RNAs were enriched for functions related to  
128 the nucleus, including RNA splicing and chromatin organization (Fig. 2B and Supplemental

129 Table S1). Notably, there was no significant enrichment among these localized genes for terms  
130 specifically related to plasticity or synaptic function.

131 Differential expression analysis may not identify all localized RNAs because not all  
132 localized RNAs are expected to have higher expression concentration in the dendrites than the  
133 soma. This may be particularly relevant when expression is profiled at the single cell level, since  
134 factors such as bursting transcription and variable rates of localization can lead to high variability  
135 in the relative amounts of RNA in each compartment at the time of collection. Therefore, we  
136 additionally identified RNAs that were consistently present in the dendrites across the profiled  
137 cells, since these RNAs are likely to have important dendrite function even if they are not  
138 differentially at higher concentration in the dendrites compared to the soma. We found 1,863  
139 RNAs in at least 90% of the dendrite samples, which included well-characterized localized  
140 RNAs such as *Actb*, *Bdnf*, *Calm1*, *Dlg4*, *Grin1*, and *Map2*. To differentiate from the 387  
141 differentially expressed genes described above, we refer to this set as the constitutive dendritic  
142 (consDend) RNAs, and the previous set as the differentially expressed dendritic (deDend) RNAs.  
143 The consDend RNAs covered many of the same ontology functions as the deDend RNAs, such  
144 as mitochondria and translation, but additionally were strongly enriched for a large number of  
145 synaptic and localization-related GO terms (Fig. 2C and Supplemental Table S1). The consDend  
146 RNAs also contained a large number of genes with the GO annotation “myelin sheath”, which is  
147 unexpected given that this term is normally associated with axons. However, closer examination  
148 showed that this term includes genes with a wide variety of other functions (Supplemental Table  
149 S1), and the consDend list does not contain myelin basic protein (*Mbp*). Overall, the differences  
150 between the deDend and consDend lists suggest that at the single cell level, RNAs with  
151 important dendritic and synaptic functions are often not localized to the point of having higher

152 expression concentration in the dendrites relative to the soma, but are nonetheless consistently  
153 present in the dendrites at a lower level.

154         Single cell analysis also allows us to examine the variability of localization across cells.  
155 For each of the 387 deDend RNAs, we calculated the variation of localization across cells based  
156 on the variance of the dendritic read fraction (defined as the number of dendritic reads divided by  
157 the sum of the dendritic and somatic reads for each cell). The top 40 genes with the highest and  
158 lowest localization variability are shown in Figure 2D. The high variability genes had lower  
159 median total-cell expression (dendritic + somatic reads) than the low variability genes (76.6 and  
160 415.7 reads, respectively), and it should be noted that differences in expression level can  
161 potentially contribute to observed variability in single cell experiments. From a biological  
162 perspective, low variability of localization suggests a gene is localized by a constitutive  
163 mechanism and is needed in constant supply in the dendrites, whereas high variability suggests  
164 more dynamic localization mechanisms which may be activated in response to stimuli. The genes  
165 with the highest variability of localization included several enzymes (*Serhl*, *Ptpn14*, *Liph*,  
166 *Mre11*, *Aox3*, *Casp4*, *Ddx58*), most of which do not currently have a defined dendritic function,  
167 although mutations in *Mre11* have been previously associated with Ataxia-telangiectasia-like  
168 disorder 1 (Stewart et al. 1999). These high variability genes also showed more “all-or-nothing”  
169 localization than the low variability genes, with most cells having a dendritic read fraction of  
170 close to either zero or one (Fig. 2D). Genes with the least variable localization included  
171 components of the ubiquinol-cytochrome c reductase complex (*Uqcrcq*, *Uqcr11*), ATP synthase  
172 complex (*Atp5e*, *Atp5k*), and ribosomal subunits (*Rplp0*, *Rps25*), some of which in humans have  
173 been implicated in schizophrenia and schizoaffective disorder (Arion et al. 2015). These results  
174 give further support to the idea that genes involved in respiration and translation are needed in

175 constant supply in the dendrites, and suggest that this might be accomplished by a constitutive  
176 localization mechanism that is relatively constant across cells.

177

### 178 ***Differential localization of 3'UTR isoforms***

179         Given the potential importance of alternative 3'UTR usage in dendritic localization, we  
180 sought to better define genes that have 3'-isoform-specific dendritic localization in primary  
181 neurons. As a result of the aRNA single cell RNA amplification process (Morris, Singh, and  
182 Eberwine 2011; Van Gelder et al. 1990; Eberwine et al. 1992), the majority of our sequencing  
183 reads map within 500nt of a 3' end (Fig. 3A), and we thus have high coverage of these regions  
184 for identifying expressed 3'UTR isoforms. We quantified the expression of individual 3'  
185 isoforms based on the last 500nt of each isoform, merging any 3' ends that were closer than  
186 500nt into a single feature. Individual cells widely expressed multiple 3' isoforms per gene, with  
187 somas showing slightly more alternative expression than dendrites on average (1.26 and 1.13  
188 expressed 3'UTR isoforms per gene, respectively; Fig. 3B). When multiple isoforms were  
189 expressed, one isoform tended to be dominant, making up ~85% of the gene reads on average in  
190 both compartments. To compare differential isoform representation between soma and dendrite,  
191 we limited the considered 3'UTR isoforms to only the top two most highly expressed isoforms  
192 per gene, which accounted for the vast majority of reads in most genes. The top two isoforms  
193 were labeled "proximal" (the more 5' isoform) or "distal" (the more 3' isoform), and isoform  
194 preference for each gene in each sample was summarized as the fraction of reads mapping to the  
195 distal isoform (distal reads divided by distal plus proximal reads), which we refer to as the distal  
196 fraction (DF). We focused our analysis only on multi-3'UTR genes that had at least 10 total reads  
197 in both the soma and dendrites of at least five cells, which resulted in 3,638 considered genes.



198 We note that alternative 3'UTRs can be generated by two distinct mechanisms: alternative  
199 splicing, which generates alternative last exons (ALEs), or alternative cleavage and  
200 polyadenylation, which generates tandem UTRs (Fig. 3C). Therefore, we split our set of multi-  
201 3'UTR genes into ALE and tandem groups based on the relationship between the designated  
202 proximal and distal 3'UTR for that gene. ALEs made up the majority of the considered multi-  
203 3'UTR genes (3,108 ALE versus 530 tandem).

204 To identify 3'UTR isoforms that are differentially localized to dendrites, we looked for  
205 genes that had consistent patterns of isoform preference across our cells. That is, we looked for  
206 cases where the change in distal fraction ( $\Delta DF$ ; defined as  $DF_{\text{dendrite}} - DF_{\text{soma}}$  and calculated  
207 separately for each soma-dendrite pair) was in a consistent direction (+/-) across multiple cells  
208 (Fig. 3D). Using a Wilcoxon signed-rank test ( $p < 0.1$ ), we identified 298 genes that met this  
209 criterion. For clarity, we will refer to these 298 genes as isoform-specific dendritic (isoDend)  
210 RNAs. Most of the isoDend RNAs were categorized as ALEs (249 ALE, 49 tandem), but neither  
211 type was significantly enriched in this group compared to the full set of multi-3'UTR genes.  
212 Unlike the deDend and consDend sets, the isoDend RNAs were not significantly enriched for  
213 particular GO functional categories. Only four of the isoDend RNAs overlapped with the deDend  
214 list (*mt-Rnr2*, *Rpl31*, *Rpl21*, and *Map2*), indicating that gene-level and isoform-level localized  
215 genes are distinct sets. In contrast, approximately half of each the deDend and isoDend sets  
216 overlapped with the consDend set (Fig. 3E).

217 Among the 298 isoDend isoform pairs, dendrites preferred the distal isoform in 64% of  
218 cases, which was independent of ALE/tandem status. This preference diverged significantly from  
219 expectation: in the full set of 3,638 multi-3'UTR genes, dendrites preferred the distal isoform in  
220 only 44% of cases ( $p = 3.7e-13$ ; odds ratio=2.4; Fisher's exact test). Next, we examined the cell-

221 to-cell variability of isoform preferences, particularly focusing on the differences in DF  
222 variability between somas and dendrites. For each gene, the variance of DF across samples was  
223 calculated separately for soma and dendrite samples. We found that 61.1% of the isoDend genes  
224 had a more variable DF in the soma than in the dendrites. Again, this observation diverged  
225 significantly from expectation based on the full set of multi-3'UTR genes, where only 29.4% of  
226 the genes had a more variable DF in the soma ( $p < 2.2e-16$ ; odds ratio=3.6; Fisher's exact test).  
227 Thus, dendrites showed more specific and consistent isoform preference among the isoDend  
228 genes compared to somas, potentially suggesting that certain isoforms are being selectively  
229 concentrated in the dendrites due to the presence of *cis* localization signals in the alternative  
230 portion of the 3'UTR. Figure 4 provides three representative examples of genes with these  
231 isoform patterns, showing the consistent preference for the distal isoform in the dendrites  
232 compared to soma for multiple individual cells, and the lower variability of DF in the dendrites  
233 compared to the somas. Finally, we looked to see how many of the dendrite-preferred isoforms  
234 were among the ~2,000 new, distal 3'UTRs annotated recently by Miura *et al.* in several tissues  
235 (Miura et al. 2013). Thirty eight of the dendrite-preferred isoforms overlapped this list (including  
236 *Uck2* and *Ube2i* shown in Fig. 4), 12 of which were specific to hippocampal neurons in that  
237 study (Miura et al. 2013).

238

### 239 ***Dendritic targeting motifs***

240 We computationally analyzed the deDend, isoDend, and consDend gene lists to identify  
241 potential dendritic targeting elements (DTEs) enriched in each set. We first searched for  
242 instances of known RBP motifs. The greatest enrichment was seen for SRSF3 binding motif  
243 AUCAWCG, which was 2.4 times more common in the deDend RNAs than background and

244 occurred in 59 of the 387 genes in this set. The same SRSF3 motif was also the most enriched  
245 motif in the consDend set (1.5 times more common than background) and occurred in 265 of the  
246 1,863 genes in this set. SRSF3 is a brain-expressed splicing factor, and although no specific role  
247 for this RBP in neurons has been described, it was recently shown in mouse P19 cells to promote  
248 3'UTR lengthening through distal polyadenylation site usage and promote nuclear export  
249 through recruitment of NXF1 (Müller-McNicoll et al. 2016). Therefore, one hypothesis could be  
250 that SRSF3 plays a role in the early steps of dendritic localization by promoting inclusion of  
251 alternative 3'UTRs (theoretically containing DTEs) and by facilitating nuclear export. We also  
252 performed a *de novo* motif analysis using HOMER (Brenner 2010) to see if any previously  
253 unidentified motifs were enriched in our sequences. The top motif in each set was UUCGAU ( $p$   
254 = 0.0001, odds ratio = 2.9, Hypergeometric test) CCGCAA ( $p = 1e-7$ , odds ratio 1.7) and  
255 GUGGGU ( $p = 0.01$ , odds ratio = 1.2) in the deDend, consDend, and isoDend sets, respectively.  
256 One motif, CGCR, was enriched in all three sets, but was only slightly more common in  
257 localizers than background (odds ratio < 1.2).

258         Since G-quadruplexes have been implicated previously in dendritic localization  
259 (Subramanian et al. 2011), we also searched our localized sequences for regions that could  
260 potentially form this structure. Using a regular expression (see Methods), we searched for  
261 potential G-quadruplexes in the 3'UTRs of each localized gene or isoform. G-quadruplexes were  
262 2.0 times more common in the deDend RNAs ( $p = 0.003$ , Fisher's exact test), 1.9 times more  
263 common in the consDend RNAs ( $p = 5.0e-12$ , Fisher's exact test), and 1.7 times more common  
264 in the isoDend RNAs (not significant;  $p = 0.14$ , Fisher's exact test) than the non-localized  
265 background. Overall, 448 of the 2,225 localized genes had at least one potential G-quadruplex in  
266 the localized 3'UTR. These results support a possible role for G-quadruplexes in localization in

267 deDend and consDend RNAs, and possibly to a lesser extent in isoDend, but overall it does not  
268 appear that this motif alone is enough to explain the majority of localization.

269 To examine potential structural localization motifs more widely, we applied the *de novo*  
270 secondary structure motif-finding tool NoFold (Middleton and Kim 2014) to the localized  
271 3'UTR sequences. Eighty five motifs were significantly enriched compared to non-localized  
272 background sequences ( $p < 0.01$ , Fisher's exact test). Two motifs in particular stood out as  
273 occurring in a large number of sequences (over 20 unique genes each). Though more conserved  
274 on the structure level, the instances of these motifs had enough sequence similarity to suggest a  
275 common origin. Using RepeatMasker (Smit, Hubley, and Green 2013), we identified these  
276 motifs as instances of the B1 and B2 SINE families, which are ~175nt retrotransposons that form  
277 long hairpin structures. To verify that these SINEs were enriched in the localized sequences, we  
278 created covariance models (CMs) for B1 and B2 using their canonical sequences and secondary  
279 structures and used these CMs to comprehensively identify structurally conserved matches to  
280 these elements in our sequences. Compared to non-localized background sequences, B1  
281 structures were found 2.5 times more often in deDend RNAs ( $p = 0.00047$ , Fisher's exact test),  
282 1.8 times more often in consDend RNAs ( $p = 7.6e-7$ , Fisher's exact test), and 1.9 times more  
283 often in isoDend RNAs (not significant;  $p = 0.33$ , Fisher's exact test), and B2 structures were  
284 found 2.5, 1.9, and 5.7 times more often in the deDend, consDend, and isoDend RNAs  
285 respectively ( $p < 0.001$ , Fisher's exact test). Overall, 255 and 165 localized genes out of the  
286 2,225 contained a B1 or B2 match, respectively. These results show that B1 and B2 SINE-related  
287 sequences are widespread and over-represented in localized RNAs, suggesting a possible role as  
288 DTEs analogous to the role of ID retrotransposon elements in rat dendritic localization (Buckley

289 et al. 2011). Of note, only three genes contained both a G-quadruplex and a B1 or B2 motif,  
290 indicating that these signals operate on distinct sets of genes.

291

### 292 ***Functional analysis of the “local proteome” using structure information***

293       Only some of the dendritic RNAs might be involved in local protein translation.  
294 Nevertheless, to gain a better understanding of potential “local proteome”, we performed a  
295 domain-level tertiary structure prediction on the protein products of 1,930 localized mRNAs  
296 (combining the deDend, isoDend, and consDend lists and excluding non-coding RNAs). Full  
297 length proteins were split into one or more predicted domains (where “domain” is defined as an  
298 amino acid chain that likely folds into a compact, independently stable tertiary structure; see  
299 Methods), yielding a total of 6,845 domains. Each domain was classified into a SCOP structural  
300 fold using our PESS pipeline (Middleton, Illuminati, and Kim 2017). Using this approach, we  
301 were able to predict the fold of 2,005 additional domains beyond previous structural annotation  
302 (Lees et al. 2012). Using the whole-neuron proteome as a background, we found that the local  
303 dendritic proteome was highly enriched for multiple different folds, including several related to  
304 cytoskeletal structure such as Spectrin repeats and actin-binding Profilin domains (Fig. 5A).  
305 Overall, 503 different folds were represented by at least one domain in the local dendritic  
306 proteome, covering almost the entire spectrum of folds expressed in the neuron as a whole (609  
307 folds) (Fig. 5B). This suggests that rather than being highly specialized, the local dendritic RNA  
308 has the potential to encode for a diversity of protein functions on par with the whole cell.

309       To highlight some of the insight that can be gained through structure analysis, we  
310 selected several folds with important neuronal functions and assessed their representation within

311 the locally translated set, which is described in Supplemental Analysis 1 and Supplemental  
312 Tables S2-S4. A full catalog of predicted protein folds is provided in Supplemental Table S5.

313

### 314 *A master list of dendritic RNA*

315       Towards creating a definitive list of dendritic RNAs that have been observed thus far in  
316 high-throughput studies, we obtained lists of dendritic genes from six publications that profiled  
317 the dendritic transcriptome using microarray or RNA-seq (Ainsley et al. 2014; Cajigas et al.  
318 2012; Lein et al. 2007; Poon et al. 2006; Taliaferro et al. 2016; Zhong, Zhang, and Bloch 2006)  
319 and combined those lists with our own. Of a total of 5,635 unique genes on this list, only 1,404  
320 (25%) were observed in at least two studies, and none were found in all studies. The top 40 most  
321 frequently observed dendritic genes are listed in Table 1. Ribosomal proteins dominate the list,  
322 underscoring the importance of translation-related machinery in the dendrites. The most  
323 frequently observed gene was *Tpt1*, a calcium-binding protein involved in microtubule  
324 stabilization, which was observed in all but one study. The full list of dendritic genes is available  
325 in Supplemental Table S6.

326

### 327 **Discussion**

328       Neurons have special RNA localization needs compared to other cell types: their unique  
329 morphology—long, extended processes that can be many times the length of the soma—  
330 combined with an extensive need for local translation means that neurons must transport a wide  
331 variety of RNAs long distances from their origination point in the nucleus. Here, we carried out  
332 single neuron sub-cellular RNA sequencing to more precisely identify a total of 2,225 unique  
333 genes present in mouse dendrites, including 298 genes for which only a subset of the expressed

334 transcripts were localized, depending on their 3'UTR isoform. Several of these differentially  
335 localized 3'UTR isoforms were among the set of recently identified distal 3'UTRs expressed in  
336 neurons (Miura et al. 2013). Using *de novo* RNA structure motif analysis, we identified several  
337 secondary structures enriched in the 3'UTRs of the localized RNAs, including two hairpin  
338 structures derived from B1 and B2 SINE elements, which may act as localization signals.  
339 Finally, we applied a protein fold prediction algorithm to make structural and functional  
340 predictions for the set of proteins that are putatively translated locally at the synapse.

341         Based on our results, there are almost 300 genes with alternative 3' isoforms where one  
342 isoform was consistently more dendritically localized than the other. The use of alternative  
343 3'UTRs is an attractive model for how neurons might regulate localization, especially since  
344 3'UTRs theoretically have the potential to provide an element of tissue-specificity to  
345 localization. In light of this, it is somewhat surprising that of the 38 dendrite-targeted isoforms  
346 we identified that were also profiled by (Miura et al. 2013), only 12 were specific to  
347 hippocampal neurons according to the Miura data. The other 26 isoforms were found in at least  
348 one of the other mouse tissue types profiling in that study, which included spleen, liver, thymus,  
349 lung, and heart, suggesting a general lack of tissue-specificity of these dendritically-targeted  
350 isoforms. Instead, we postulate that tissue-specific localization may be achieved by tissue-  
351 restricted expression of *trans* factors (e.g. RBPs) rather than by regulation of DTE-containing  
352 isoform expression. In addition, although we observed significant enrichment of several  
353 candidate DTEs, including RBP recognition sites, G-quaduplexes, and SINE mediated hairpin  
354 structures, none of the potential regulatory elements were universal nor unique to localized RNA  
355 sequences. These results suggest that dendritic RNA localization involves multiple pathways and  
356 overlapping mechanisms (Buckley et al. 2011; Holt and Schuman 2013), and that “aggregate”

357 localization signals composed of multiple DTEs may be necessary to improve specificity and  
358 possibly also refine the destination of dendritically targeted transcripts.

359 An intriguing finding was that the composition of the deDend set was skewed towards  
360 RNAs that encode proteins that modulate RNA translation and mitochondrial function, as  
361 compared to the larger consDend set which covered many more dendrite- and synapse-specific  
362 functions. This leads us to speculate that translational regulation of dendritic protein synthesis  
363 might be dynamically modulated through stimulated transient local production of proteins that  
364 enhance the capacity to make ATP and to “jump start” the translational machinery. This jump  
365 start model would postulate a generalized but specific regulatory mechanism that could act on  
366 whatever RNAs are present at the site, without the need for individualized translation regulation  
367 of each dendritic RNA. Such a mechanism would allow the standard cellular translation  
368 mechanism to be specific without requiring the existence of new RNA transport proteins or  
369 transcript-specific translation. Regulation of local protein synthesis by the global mechanism of  
370 spatial translational control as opposed to individual RNA translational enhancement is different  
371 from current models of how dendritic protein synthesis is regulated, suggesting avenues for  
372 future experiments.

373 A crucial remaining question is what role individual locally translated proteins play in  
374 long-lasting synaptic potentiation. The post-synaptic density and surrounding dendritic spine are  
375 highly structured formations that depend on a scaffold of interacting proteins (Kim and Sheng  
376 2004; Dalva, McClelland, and Kayser 2007; Zheng et al. 2011), which in turn usually require a  
377 specific three-dimensional fold in order to function properly. Here, we provide a fold-level  
378 structure-function annotation of 1,930 proteins that we predict to be locally translated at the  
379 synapse based on our RNA localization analysis. Given that mutations linked to neuropsychiatric



380 diseases have been found to be enriched in synaptic proteins in human and mouse, and several of  
381 these mutations appear to disrupt important structures (Liu-Yesucevitz et al. 2011; Grant 2012),  
382 structural knowledge of these proteins is important for understanding these disorders. A more  
383 complete picture of the structures of locally translated proteins will help both in functional  
384 understanding and mutation-impact analysis.

385         One limitation of our study is that neurons were only surveyed at the basal state, rather  
386 than after synaptic stimulation. Several studies have shown that RNA localization changes after  
387 stimulation (Tongiorgi, Righi, and Cattaneo 1997; Steward et al. 1998; Eberwine et al. 2001;  
388 Yoon et al. 2016); therefore, the set of dendrite RNAs identified here may still be only a subset  
389 of the RNAs needed for LTP. There also may be important differences between neurons in  
390 culture and *in vivo* that would be missed in our analysis. We observed significant overlap  
391 between our localized set and a set of localized RNAs derived partly from tissue-based studies  
392 conducted after fear conditioning (Ainsley et al. 2014), suggesting a reasonable amount of  
393 concordance between basal primary cultures and post-stimulation tissue samples. Nonetheless,  
394 an important future direction will be to repeat the sub-cellular sequencing described here after  
395 stimulation. It will be particularly interesting to see if groups of RNAs that share a DTE undergo  
396 coordinated changes in localization post-activation, and conversely, if coordinated RNAs share  
397 any new DTEs.

398         In sum, our study represents a comprehensive resource for RNA localization in mouse  
399 neurons consisting of our new sub-cellular RNA sequencing dataset, a compilation of previous  
400 dendritic RNA studies, as well as computational annotation of motifs and structures. The  
401 resource generated here may have broad utility for continued study of mechanisms of dendritic  
402 RNA localization and the role of localized RNA in neuronal function and dysfunction.

403

## 404 **Materials and Methods**

405

### 406 *Neuron culture and collection*

407 Hippocampal neurons from embryonic day 18 (E18) mice (C57BL/6) were cultured as  
408 described in (Buchhalter and Dichter 1991) for 15 days. Isolated single neurons were selected for  
409 collection. A micropipette with a closed, tapered end was used to sever dendrites from the cell  
410 body. Another micropipette was used to aspirate the soma, which was deposited into a tube  
411 containing first strand synthesis buffer and RNase inhibitor and placed on ice. A separate  
412 micropipette was used to aspirate the dendrites, which were deposited into a separate tube as  
413 above. Samples were transferred to -80°C within 30 minutes and stored there until first strand  
414 synthesis. Sixteen neurons (32 total samples) were collected from multiple cultures across  
415 multiple days.

416

### 417 *Single cell RNA amplification and sequencing*

418 ERCC spike-in control RNA was diluted 1:4,000,000 and 0.9uL was added to each tube.  
419 Poly-adenylated RNA was amplified using two or three rounds of the aRNA *in vitro*  
420 transcription-based amplification method, as described in (Morris, Singh, and Eberwine 2011).  
421 The quality and quantity of the amplified RNA was verified using a Bioanalyzer RNA assay.  
422 Strand-specific sequencing libraries were prepared using the Illumina TruSeq Stranded kit  
423 according to the manufacturer's instructions, except that the initial poly-A capture step was  
424 skipped because the aRNA amplification procedure already selects for poly-adenylated RNA.  
425 Samples were sequenced on a HiSeq (100bp paired-end) or NextSeq (75bp paired-end) to an

426 average depth of 25 million reads. Reads were trimmed for adapter and poly-A sequence using  
427 in-house software and then mapped to the mouse genome (mm10) using STAR (Dobin et al.  
428 2013). Uniquely mapped reads were used for feature quantification using VERSE (Zhu et al.  
429 2016). The features used for each analysis are described below.

430

### 431 ***Gene-level expression and localization***

432 Three sources of gene annotations were combined to obtain a comprehensive definition  
433 of known 3' ends: Ensembl genes (downloaded from UCSC, Dec 2015); UCSC genes  
434 (downloaded from UCSC, Dec 2015); and the set of ~2,000 new 3'UTRs determined by Miura et  
435 al. (Miura et al. 2013). The 3'UTR regions of these annotations were used for quantification of  
436 reads. A single 3'UTR feature was created for each gene by taking the union of all 3'UTR  
437 regions for that gene. Read counts were calculated for each gene based on how many reads  
438 mapped to this 3'UTR region. Quantification was done using VERSE with options “-s 1 -z 3 --  
439 nonemptyModified”. For differential expression analysis, we used only the genes that had at  
440 least one read in at least half (16) of the samples. Read counts were normalized and differentially  
441 expressed genes between the dendrites and soma were identified using DESeq2 with a paired  
442 experimental design. A FDR corrected  $p \leq 0.05$  was used to identify significantly differentially  
443 expressed genes. The consDend genes were identified separately based on having at least 1 read  
444 in at least 90% (i.e. 15 out of 16) of the dendrite samples.

445 GO functional enrichment of deDend and consDend genes was calculated using the  
446 GOrilla webserver (Eden et al. 2009). For deDend genes, the background set for GO analysis  
447 was all genes with at least one read in half the samples; for the consDend genes, the background  
448 was all genes with at least one read in at least 15 samples (i.e. the input sets for each analysis).

449 Gene markers of pyramidal neurons and cardiomyocytes, as well as housekeeping genes,  
450 were obtained from (Dueck et al. 2015). Markers of other mouse brain cell types were obtained  
451 from (Zhang et al. 2014).

452

### 453 *Isoform-level expression and localization*

454 To quantify individual 3' isoforms of genes, we used the last 500nt of each 3' end for that  
455 gene as the isoform quantification feature. Any 3' ends that were less than 500nt apart were  
456 merged together into a single quantification feature. Thus, the final set of 3' isoform  
457 quantification features is non-overlapping. Isoform read counts were calculated by VERSE using  
458 the same parameters as above. Genes with only one expressed 3' isoform were removed from  
459 further analysis to focus on alternative expression of 3' isoforms.

460 To identify the top two 3' isoforms for each gene, the following procedure was used. For  
461 each gene in each sample, the fraction of reads mapping to each isoform was calculated (that is,  
462 the number of reads mapping to that isoform divided by the total reads for all isoforms of the  
463 gene). The fractions for each isoform were then summed up across samples (unless a sample had  
464 fewer than 10 reads total for that gene, in which case it was skipped) and the two isoform with  
465 the highest total per gene were considered the top two isoforms for that gene. The purpose of this  
466 process was to give each sample equal weight in the final decision of the top 3'UTR, while also  
467 excluding samples with too few reads to give a reliable estimate of the isoform fractions. This  
468 process was repeated for each gene with at least two expressed isoforms in the dataset. Then for  
469 each gene, whichever of the top two isoforms was more 5' (as defined by the locations of their  
470 500nt quantification features) was designated the "proximal" isoform, and whichever was more  
471 3' was designated the "distal" isoform. Finally, for each gene in each sample, we calculated the

472 distal fraction (DF) as the fraction of reads mapping to the distal isoform divided by the total  
473 reads mapping to the distal and proximal isoforms.

474 We defined the proximal and distal isoforms as being, relative to each other, generated by  
475 alternative splicing (ALEs) or alternative cleavage and polyadenylation (Tandem UTRs) by the  
476 following criterion: if the full length 3'UTRs of a pair of isoforms were directly adjacent or  
477 overlapping, they were called tandem; otherwise, they were called ALEs.

478 The differential localization of isoforms was determined based on the change in distal  
479 fraction between soma and dendrites of the same original neuron. A non-parametric paired test of  
480 differences (Wilcoxon signed-rank test) was used to identify genes with consistent changes in  
481 distal fraction across samples. Only genes with at least five pairs of samples (where a “pair”  
482 means the soma and dendrites from the same original neuron) where each member of the pair  
483 had at least 10 combined reads for the two isoforms were tested (3,638 genes), to ensure there  
484 was enough read- and sample-support to reliably identify these events.

485 GO enrichment was done on the dendrite-enriched isoforms as described in the previous  
486 section, using the input set of 3,638 genes as background.

487

#### 488 ***Background datasets for motif enrichment***

489 We generated a pool of “non-localized” background sequences based on the list of genes  
490 that were significantly higher expressed in the soma from the gene-level DESeq2 analysis  
491 described above. We filtered this set to remove any overlap with one of the other localized lists  
492 (i.e. the consDend list and the isoDend list) and any overlap with previously annotated  
493 dendritically localized genes in order to make this list as specific to non-localized genes as  
494 possible. Since motif frequency in a sequence can be related to sequence length, we created a

495 length-matched background set for each of the three localized gene lists as follows: (1) for each  
496 localized gene in the set, scan the pool of non-localized genes in order of their somatic  
497 specificity (starting with the most soma-specific, as indicated by its DESeq2 test statistic); (2)  
498 select the first non-localized gene encountered with a 3'UTR length within 100nt of the localized  
499 gene's 3'UTR length; (3) add the selected non-localized gene to the background set and remove  
500 it from the pool; (4) if no background gene can be found that meets the 100nt criteria, select  
501 whichever gene in the pool that has the most similar 3'UTR length to the localized gene's  
502 3'UTR. Using this protocol resulted in background sets with highly similar length characteristics  
503 to the foreground set.

504

### 505 ***RNA motif analysis***

506 Linear motifs were identified using the HOMER motif-finding suite (Brenner 2010). *De*  
507 *novo* enriched motif searches were done using the script “findMotifs.pl” and set to look for either  
508 short motifs (4 or 6nt) or long motifs (8, 10, or 12nt). Enrichment of known RBP binding motifs  
509 was analyzed using the same script with option “-known” in combination with a custom set of  
510 positional weight matrices specifying binding preferences that was downloaded from CISBP-  
511 RNA (version 0.6) (Ray et al. 2013). A log-odds threshold for RBP motif matching was set for  
512 each motif separately based on the number of informative positions in the motif such that longer,  
513 more specific motifs had a higher log-odds threshold for calling a match. The background sets  
514 used for enrichment testing were the length-matched non-localized sets described above.

515 G-quadruplexes were identified by regular expression search using the “re” module in  
516 Python. The search pattern was '([gG]{3,}\w{1,7}){3,}[gG]{3,}', which requires three  
517 consecutive matches to the pattern “three or more G's followed by 1-7 of any nucleotide” and



541 of high quality matches in the localized set compared to the non-localized background (same  
542 background as above). Only one match was counted per gene for the purposes of enrichment  
543 testing.

544

### 545 *Protein structure analysis*

546 For each predicted dendritic RNA we obtained the canonical protein sequence, if any,  
547 from UniProt (The UniProt Consortium 2017). The canonical isoform is defined by UniProt to  
548 usually be the one that is most inclusive of exons/domains. We refer to this protein set as the  
549 “local proteome”. We also obtained the canonical protein sequences for the full set of expressed  
550 genes in soma and dendrite samples (at least 1 read in at least 15 samples) to use as a background  
551 for comparison with the local proteome.

552 Each protein was split into domains based on DomainFinder Gene3D predictions (Yeats,  
553 Redfern, and Orengo 2010; Lees et al. 2012). If there were regions between, before, or after  
554 predicted domains that were longer than 30 amino acids (aa) but did not have a Gene3D  
555 prediction, we also included these. If a “filled in” region such as this was longer than 450 aa, we  
556 used a sliding window of 300 aa (slide = 150 aa) to break it into smaller pieces, since domains  
557 are rarely larger than this. The fold of each domain was predicted using the method described in  
558 (Middleton, Illuminati, and Kim 2017). A nearest neighbor distance threshold of  $\leq 17.5$  was used  
559 to designate “high confidence” predictions, and a more lenient threshold of  $\leq 30$  was used to  
560 designate “medium confidence” predictions.

561

562

563



564 **Acknowledgements**

565 This work was funded in part by NIMH U01MH098953 to JK and JE, NIGMS R01 GM110005  
566 to JE and JK, and Health Research Formula Fund from the Pennsylvania Commonwealth to JK.  
567 SM was supported by a DOE CSGF fellowship (DE-FG02-97ER25308). The funding agencies  
568 played no direct role in design, analyses, and conclusions presented in this work.

569

570 **Competing Interests**

571 The authors have no competing interests in the execution and publication of this work.

572

573 **References**

- 574 Aakalu, G, W B Smith, N Nguyen, C Jiang, and E M Schuman. 2001. “Dynamic Visualization of  
575 Local Protein Synthesis in Hippocampal Neurons.” *Neuron* 30 (2): 489–502.
- 576 Ainsley, Joshua A, Laurel Drane, Jonathan Jacobs, Kara A Kittelberger, and Leon G Reijmers.  
577 2014. “Functionally Diverse Dendritic mRNAs Rapidly Associate with Ribosomes  
578 Following a Novel Experience.” *Nature Communications* 5 (January). Nature Publishing  
579 Group: 4510. doi:10.1038/ncomms5510.
- 580 An, Juan Ji, Kusumika Gharami, Guey Ying Liao, Newton H. Woo, Anthony G. Lau, Filip  
581 Vanevski, Enrique R. Torre, et al. 2008. “Distinct Role of Long 3’ UTR BDNF mRNA in  
582 Spine Morphology and Synaptic Plasticity in Hippocampal Neurons.” *Cell* 134 (1): 175–87.  
583 doi:10.1016/j.cell.2008.05.045.
- 584 Arion, D, J P Corradi, S Tang, D Datta, F Boothe, A He, A M Cacace, et al. 2015. “Distinctive  
585 Transcriptome Alterations of Prefrontal Pyramidal Neurons in Schizophrenia and

- 586 Schizoaffective Disorder.” *Molecular Psychiatry* 20: 1397–1405. doi:10.1038/mp.2014.171.
- 587 Brenner, C. 2010. “HOMER: Software for Motif Discovery and next Generation Sequencing  
588 Analysis.” <http://homer.ucsd.edu>.
- 589 Buchhalter, Jeffrey R., and Marc A. Dichter. 1991. “Electrophysiological Comparison of  
590 Pyramidal and Stellate Nonpyramidal Neurons in Dissociated Cell Culture of Rat  
591 Hippocampus.” *Brain Research Bulletin* 26 (3): 333–38. doi:10.1016/0361-9230(91)90003-  
592 3.
- 593 Buckley, Peter T, Miler T Lee, Jai-Yoon Sul, Kevin Y Miyashiro, Thomas J Bell, Stephen A  
594 Fisher, Junhyong Kim, and James Eberwine. 2011. “Cytoplasmic Intron Sequence-  
595 Retaining Transcripts Can Be Dendritically Targeted via ID Element Retrotransposons.”  
596 *Neuron* 69 (5). Elsevier Inc.: 877–84. doi:10.1016/j.neuron.2011.02.028.
- 597 Cajigas, Iván J, Georgi Tushev, Tristan J Will, Susanne tom Dieck, Nicole Fuerst, and Erin M  
598 Schuman. 2012. “The Local Transcriptome in the Synaptic Neuropil Revealed by Deep  
599 Sequencing and High-Resolution Imaging.” *Neuron* 74 (3): 453–66.  
600 doi:10.1016/j.neuron.2012.02.036.
- 601 Crino, P B, and J Eberwine. 1996. “Molecular Characterization of the Dendritic Growth Cone:  
602 Regulated mRNA Transport and Local Protein Synthesis.” *Neuron* 17 (6): 1173–87.
- 603 Dalva, Matthew B, Andrew C McClelland, and Matthew S Kayser. 2007. “Cell Adhesion  
604 Molecules: Signalling Functions at the Synapse.” *Nature Reviews Neuroscience* 8 (3): 206–  
605 20. doi:10.1038/nrn2075.
- 606 Dobin, Alexander, Carrie a Davis, Felix Schlesinger, Jorg Drenkow, Chris Zaleski, Sonali Jha,  
607 Philippe Batut, Mark Chaisson, and Thomas R Gingeras. 2013. “STAR: Ultrafast Universal

- 608 RNA-Seq Aligner.” *Bioinformatics (Oxford, England)* 29 (1): 15–21.  
609 doi:10.1093/bioinformatics/bts635.
- 610 Dueck, Hannah, Mugdha Khaladkar, Tae Kim, Jennifer Spaethling, Chantal Francis, Sangita  
611 Suresh, Stephen Fisher, et al. 2015. “Deep Sequencing Reveals Cell-Type-Specific Patterns  
612 of Single-Cell Transcriptome Variation.” *Genome Biology* 16 (1). Genome Biology: 122.  
613 doi:10.1186/s13059-015-0683-4.
- 614 Eberwine, J, K Miyashiro, J E Kacharina, and C Job. 2001. “Local Translation of Classes of  
615 mRNAs That Are Targeted to Neuronal Dendrites.” *Proceedings of the National Academy  
616 of Sciences* 98 (13): 7080–85. doi:10.1073/pnas.121146698.
- 617 Eberwine, J, H Yeh, K Miyashiro, Y Cao, S Nair, R Finnell, M Zettel, and P Coleman. 1992.  
618 “Analysis of Gene Expression in Single Live Neurons.” *Proceedings of the National  
619 Academy of Sciences of the United States of America* 89 (7): 3010–14.  
620 doi:10.1073/pnas.89.7.3010.
- 621 Eden, Eran, Roy Navon, Israel Steinfeld, Doron Lipson, and Zohar Yakhini. 2009. “GORilla: A  
622 Tool for Discovery and Visualization of Enriched GO Terms in Ranked Gene Lists.” *BMC  
623 Bioinformatics* 10 (1): 48. doi:10.1186/1471-2105-10-48.
- 624 Francis, Chantal, Shreedhar Natarajan, Miler T Lee, Mugdha Khaladkar, Peter T Buckley, Jai-  
625 Yoon Sul, James Eberwine, and Junhyong Kim. 2014. “Divergence of RNA Localization  
626 between Rat and Mouse Neurons Reveals the Potential for Rapid Brain Evolution.” *BMC  
627 Genomics* 15 (1): 883. doi:10.1186/1471-2164-15-883.
- 628 Grant, Seth GN. 2012. “Synaptopathies: Diseases of the Synaptome.” *Current Opinion in  
629 Neurobiology* 22 (3). Elsevier Ltd: 522–29. doi:10.1016/j.conb.2012.02.002.

- 630 Gruber, Andreas R., Ronny Lorenz, Stephan H. Bernhart, R. Neubock, and Ivo L. Hofacker.  
631 2008. "The Vienna RNA Websuite." *Nucleic Acids Research* 36 (Web Server): W70–74.  
632 doi:10.1093/nar/gkn188.
- 633 Holt, Christine E., and Erin M. Schuman. 2013. "The Central Dogma Decentralized: New  
634 Perspectives on RNA Function and Local Translation in Neurons." *Neuron* 80 (3). Elsevier  
635 Inc.: 648–57. doi:10.1016/j.neuron.2013.10.036.
- 636 Job, C., and J. Eberwine. 2001. "Identification of Sites for Exponential Translation in Living  
637 Dendrites." *Proceedings of the National Academy of Sciences* 98 (23): 13037–42.  
638 doi:10.1073/pnas.231485698.
- 639 Kim, Eunjoon, and Morgan Sheng. 2004. "PDZ Domain Proteins of Synapses." *Nature Reviews*  
640 *Neuroscience* 5 (10): 771–81. doi:10.1038/nrn1517.
- 641 Lees, Jonathan, Corin Yeats, James Perkins, Ian Sillitoe, Robert Rentzsch, Benoit H. Dessailly,  
642 and Christine Orengo. 2012. "Gene3D: A Domain-Based Resource for Comparative  
643 Genomics, Functional Annotation and Protein Network Analysis." *Nucleic Acids Research*  
644 40 (D1): 465–71. doi:10.1093/nar/gkr1181.
- 645 Lein, Ed S, Michael J Hawrylycz, Nancy Ao, Mikael Ayres, Amy Bensinger, Amy Bernard,  
646 Andrew F Boe, et al. 2007. "Genome-Wide Atlas of Gene Expression in the Adult Mouse  
647 Brain." *Nature* 445 (7124): 168–76. doi:10.1038/nature05453.
- 648 Liao, Guey-Ying, Juan Ji An, Kusumika Gharami, Emily G Waterhouse, Filip Vanevski, Kevin  
649 R Jones, and Baoji Xu. 2012. "Dendritically Targeted Bdnf mRNA Is Essential for Energy  
650 Balance and Response to Leptin." *Nature Medicine* 18 (4). Nature Publishing Group: 564–  
651 71. doi:10.1038/nm.2687.

- 652 Liu-Yesucevitz, Liqun, Gary J Bassell, Aaron D Gitler, Anne C Hart, Eric Klann, Joel D Richter,  
653 Stephen T Warren, and Benjamin Wolozin. 2011. “Local RNA Translation at the Synapse  
654 and in Disease.” *The Journal of Neuroscience : The Official Journal of the Society for*  
655 *Neuroscience* 31 (45): 16086–93. doi:10.1523/JNEUROSCI.4105-11.2011.
- 656 Love, Michael I, Wolfgang Huber, and Simon Anders. 2014. “Moderated Estimation of Fold  
657 Change and Dispersion for RNA-Seq Data with DESeq2.” *Genome Biology* 15 (12): 550.  
658 doi:10.1186/s13059-014-0550-8.
- 659 Middleton, Sarah A., Joseph Illuminati, and Junhyong Kim. 2017. “Complete Fold Annotation of  
660 the Human Proteome Using a Novel Structural Feature Space.” *Scientific Reports* 7. Nature  
661 Publishing Group: 1–10. doi:10.1038/srep46321.
- 662 Middleton, Sarah A., and Junhyong Kim. 2014. “NoFold: RNA Structure Clustering without  
663 Folding or Alignment.” *RNA* 20 (September): 1671–83. doi:10.1261/rna.041913.113.
- 664 Miura, Pedro, Piero Sanfilippo, Sol Shenker, and Eric C Lai. 2014. “Alternative Polyadenylation  
665 in the Nervous System: To What Lengths Will 3’ UTR Extensions Take Us?” *BioEssays :*  
666 *News and Reviews in Molecular, Cellular and Developmental Biology*, June, 766–77.  
667 doi:10.1002/bies.201300174.
- 668 Miura, Pedro, Sol Shenker, Celia Andreu-Agullo, Jakub O Westholm, and Eric C Lai. 2013.  
669 “Widespread and Extensive Lengthening of 3’ UTRs in the Mammalian Brain.” *Genome*  
670 *Research* 23 (5): 812–25. doi:10.1101/gr.146886.112.
- 671 Miyashiro, K, M Dichter, and J Eberwine. 1994. “On the Nature and Differential Distribution of  
672 mRNAs in Hippocampal Neurites: Implications for Neuronal Functioning.” *Proceedings of*  
673 *the National Academy of Sciences of the United States of America* 91 (23): 10800–804.

- 674 Morris, Jacqueline, Jennifer M Singh, and James H Eberwine. 2011. “Transcriptome Analysis of  
675 Single Cells.” *Journal of Visualized Experiments : JoVE*, no. 50(January): 1–8.  
676 doi:10.3791/2634.
- 677 Müller-McNicoll, Michaela, Valentina Botti, Antonio M. de Jesus Domingues, Holger Brandl,  
678 Oliver D. Schwich, Michaela C. Steiner, Tomaz Curk, Ina Poser, Kathi Zarnack, and Karla  
679 M. Neugebauer. 2016. “SR Proteins Are NXF1 Adaptors That Link Alternative RNA  
680 Processing to mRNA Export.” *Genes & Development* 30 (5): 553–66.  
681 doi:10.1101/gad.276477.115.
- 682 Poon, Michael M, Sang-Hyun Choi, Christina a M Jamieson, Daniel H Geschwind, and Kelsey C  
683 Martin. 2006. “Identification of Process-Localized mRNAs from Cultured Rodent  
684 Hippocampal Neurons.” *The Journal of Neuroscience : The Official Journal of the Society  
685 for Neuroscience* 26 (51): 13390–99. doi:10.1523/JNEUROSCI.3432-06.2006.
- 686 Ray, Debashish, Hilal Kazan, Kate B. Cook, Matthew T. Weirauch, Hamed S. Najafabadi, Xiao  
687 Li, Serge Gueroussov, et al. 2013. “A Compendium of RNA-Binding Motifs for Decoding  
688 Gene Regulation.” *Nature* 499 (7457). Nature Publishing Group: 172–77.  
689 doi:10.1038/nature12311.
- 690 Smit, AFA, R Hubley, and P Green. 2013. “RepeatMasker Open-4.0.”  
691 <http://www.repeatmasker.org>.
- 692 Steward, Oswald, Christopher S. Wallace, Gregory L. Lyford, and Paul F. Worley. 1998.  
693 “Synaptic Activation Causes the mRNA for the IEG Arc to Localize Selectively near  
694 Activated Postsynaptic Sites on Dendrites.” *Neuron* 21 (4): 741–51. doi:10.1016/S0896-  
695 6273(00)80591-7.

- 696 Stewart, G, R Maser, T Stankovic, D Bressan, M Kaplan, N Jaspers, A Raans, P Byrd, J Petrini,  
697 and M Taylor. 1999. “The DNA Double Strand Break Repair Gene hMRE11 Is Mutated in  
698 Individuals with an Ataxia-Telangiectasia like Disorder.” *Cell* 99: 577–87.  
699 doi:10.1016/S0092-8674(00)81547-0.
- 700 Subramanian, Murugan, Florence Rage, Ricardos Tabet, Eric Flatter, Jean-Louis Mandel, and  
701 Hervé Moine. 2011. “G-Quadruplex RNA Structure as a Signal for Neurite mRNA  
702 Targeting.” *EMBO Reports* 12 (7): 697–704. doi:10.1038/embor.2011.76.
- 703 Taliaferro, J. Matthew, Marina Vidaki, Ruan Oliveira, Sara Olson, Lijun Zhan, Tanvi Saxena,  
704 Eric T. Wang, et al. 2016. “Distal Alternative Last Exons Localize mRNAs to Neural  
705 Projections.” *Molecular Cell* 61 (6). Elsevier Inc.: 821–33.  
706 doi:10.1016/j.molcel.2016.01.020.
- 707 The UniProt Consortium. 2017. “UniProt: The Universal Protein Knowledgebase.” *Nucleic  
708 Acids Research* 45 (D1): D158–69. doi:10.1093/nar/gkw1099.
- 709 Tongiorgi, E, M Righi, and A Cattaneo. 1997. “Activity-Dependent Dendritic Targeting of  
710 BDNF and TrkB mRNAs in Hippocampal Neurons.” *The Journal of Neuroscience* 17 (24):  
711 9492–9505.
- 712 Van Gelder, R N, M E von Zastrow, A Yool, W C Dement, J D Barchas, and J H Eberwine.  
713 1990. “Amplified RNA Synthesized from Limited Quantities of Heterogeneous cDNA.”  
714 *Proceedings of the National Academy of Sciences of the United States of America* 87 (5):  
715 1663–67.
- 716 Yeats, Corin, Oliver C. Redfern, and Christine Orengo. 2010. “A Fast and Automated Solution  
717 for Accurately Resolving Protein Domain Architectures.” *Bioinformatics* 26 (6): 745–51.

718           doi:10.1093/bioinformatics/btq034.

719   Yoon, Young J., Bin Wu, Adina R. Buxbaum, Sulagna Das, Albert Tsai, Brian P. English,  
720           Jonathan B. Grimm, Luke D. Lavis, and Robert H. Singer. 2016. “Glutamate-Induced RNA  
721           Localization and Translation in Neurons.” *Proceedings of the National Academy of Sciences*  
722           113 (44): E6877–86. doi:10.1073/pnas.1614267113.

723   Zhang, Y., K Chen, S A Sloan, M L Bennett, A R Scholze, S O’Keeffe, H P Phatnani, et al.  
724           2014. “An RNA-Sequencing Transcriptome and Splicing Database of Glia, Neurons, and  
725           Vascular Cells of the Cerebral Cortex.” *Journal of Neuroscience* 34 (36): 11929–47.  
726           doi:10.1523/JNEUROSCI.1860-14.2014.

727   Zheng, C.-Y., G. K. Seabold, M. Horak, and R. S. Petralia. 2011. “MAGUKs, Synaptic  
728           Development, and Synaptic Plasticity.” *The Neuroscientist* 17 (5): 493–512.  
729           doi:10.1177/1073858410386384.

730   Zhong, Jun, Theresa Zhang, and Lisa M Bloch. 2006. “Dendritic mRNAs Encode Diversified  
731           Functionalities in Hippocampal Pyramidal Neurons.” *BMC Neuroscience* 7 (January): 17.  
732           doi:10.1186/1471-2202-7-17.

733   Zhu, Qin, Stephen A Fisher, Jamie Shallcross, and Junhyong Kim. 2016. “VERSE: A Versatile  
734           and Efficient RNA-Seq Read Counting Tool.” *bioRxiv*, <https://doi.org/10.1101/053306>.  
735           doi:<https://doi.org/10.1101/053306>.

736



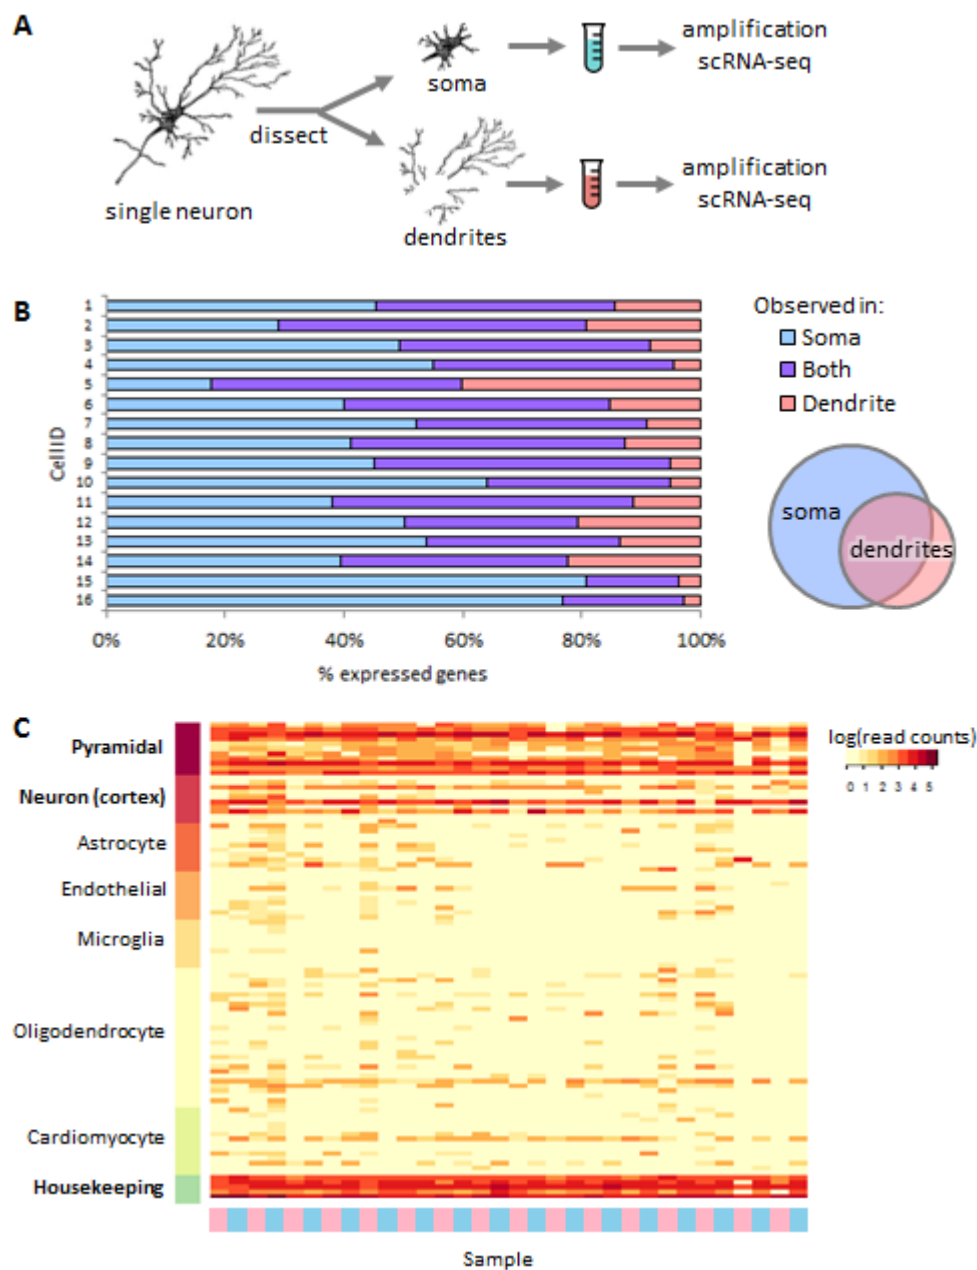

737

738 **Figure 1. Sub-single cell profiling of soma and dendrite RNA.** (A) Isolated single neurons

739 were dissected to separate the soma and neurites, which were collected into separate tubes for

740 amplification and RNA-sequencing. (B) Overlap of expressed genes ( $\geq 10$  reads) between soma and

741 dendrites from the same original cell. Each horizontal bar shows the results from a single

742 neuron. The Venn diagram depicts the general relationship between the somatic and dendritic

743 transcriptomes observed in the chart, where the dendritic transcriptomes were largely a subset of  
744 the somatic transcriptome of the same cell. (C) Marker gene expression for several brain cell  
745 types. Samples (columns) are indicated as either dendritic samples (pink) or soma samples  
746 (blue). Cardiomyocyte markers are included as a control cell type that is electrically active but  
747 unrelated to brain cells.  
748

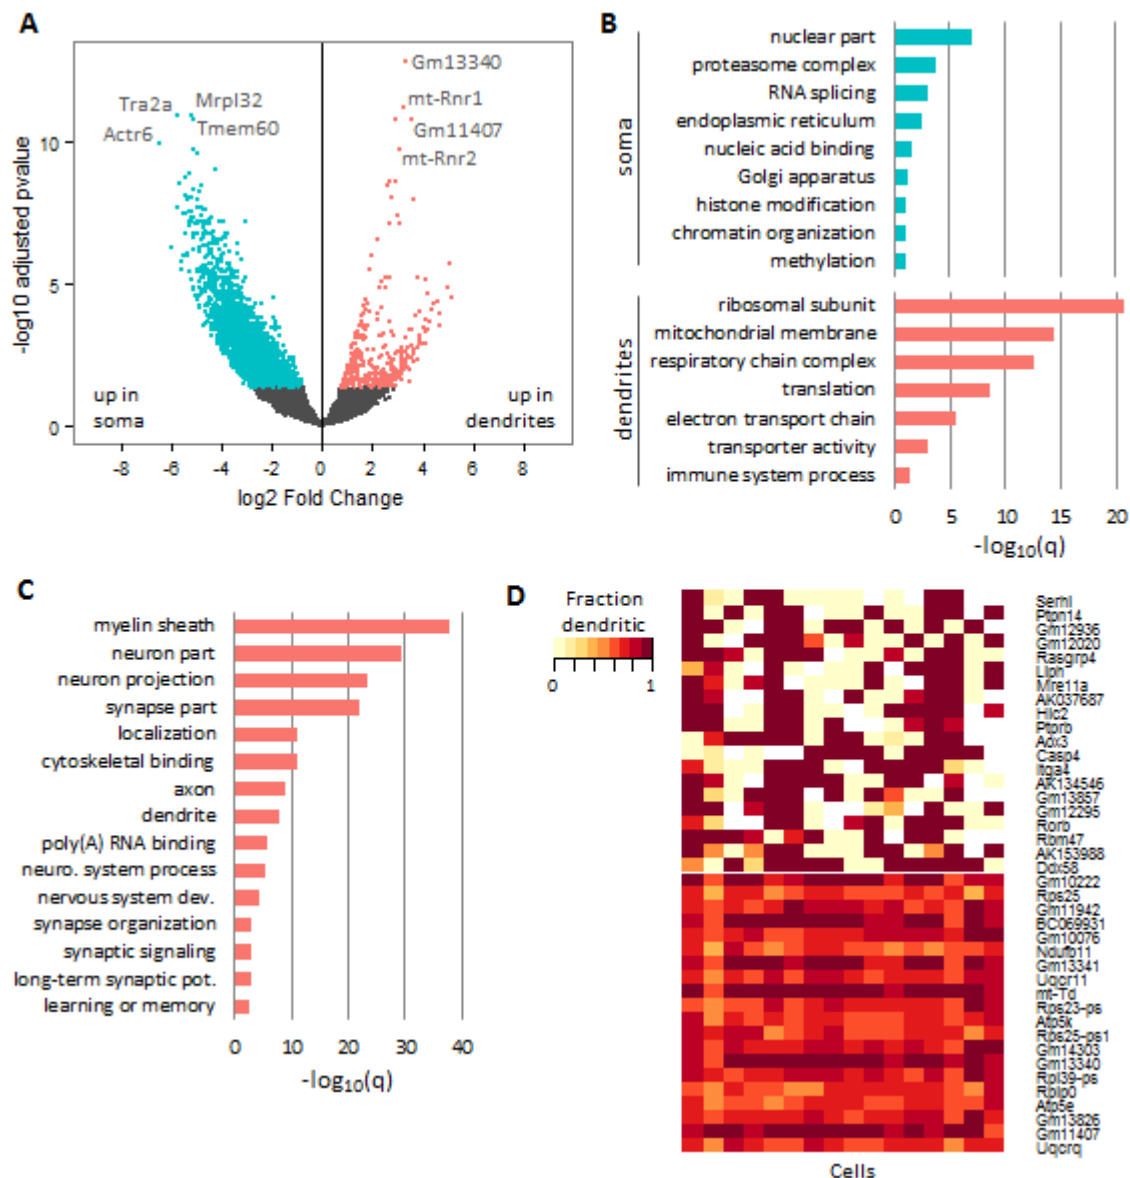

749

750 **Figure 2. Differentially expressed genes between soma and dendrites.** (A) Differentially  
 751 expressed genes in soma (blue) and dendrites (pink). (B) Selected GO terms enriched in the soma  
 752 and dendrites (deDend) based on the differential expression analysis. (C) Selected GO terms  
 753 enriched in the consDend genes. (D) Heatmap showing the dendritic read fraction for the top 40  
 754 genes (rows) with the highest and lowest variability of localization. Each column represents a  
 755 single cell.

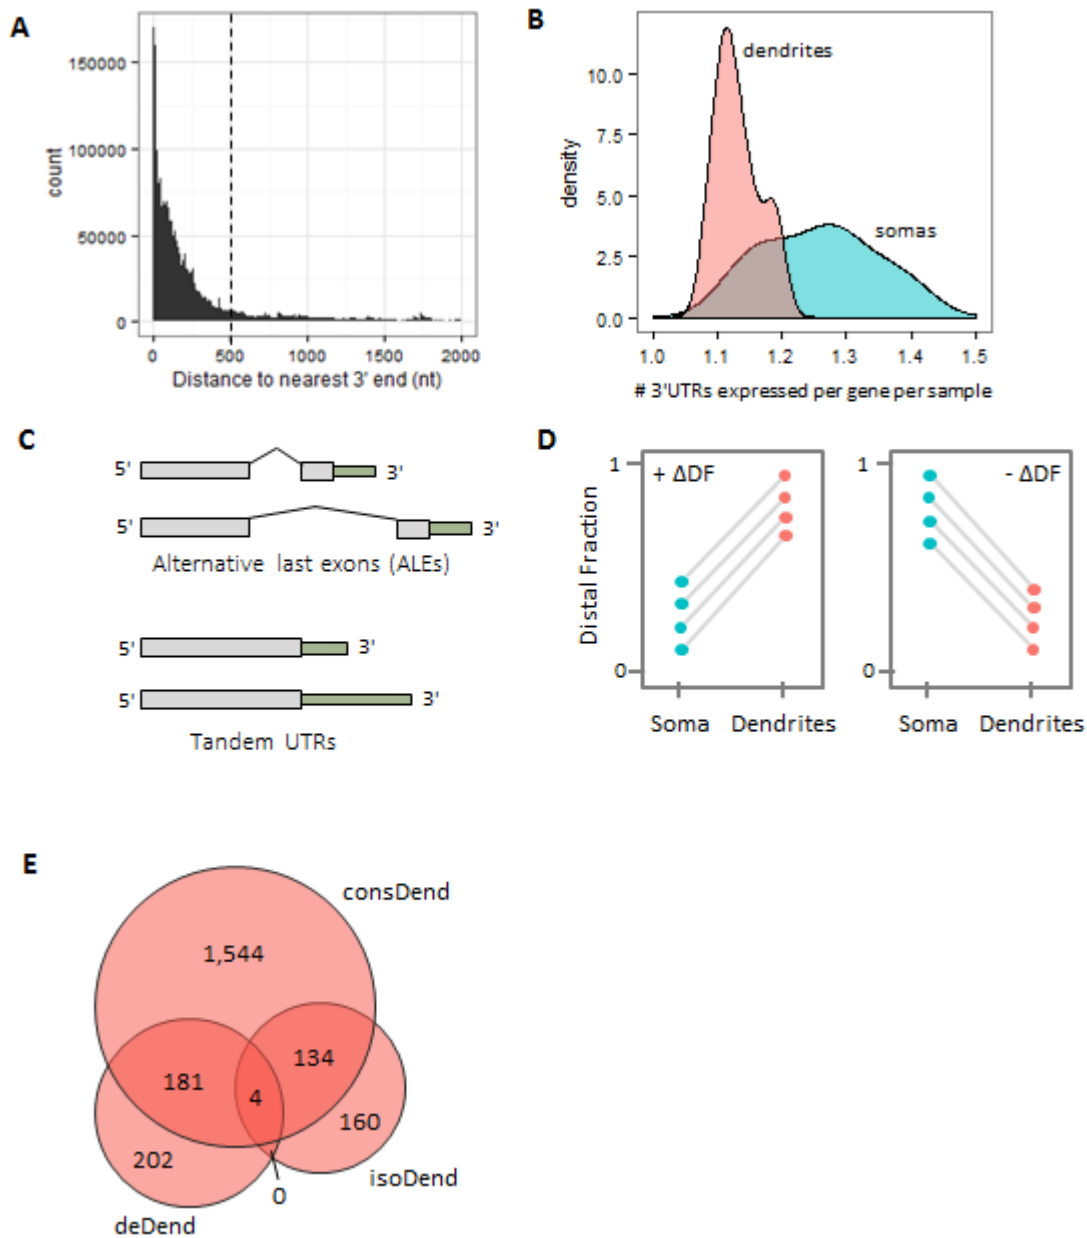

756

757 **Figure 3. Alternative 3'UTR isoform usage in neurons.** (A) Distribution of distance from read

758 ends to the nearest gene 3' end. Most reads are within 500nt of the nearest end (dotted line). (B)

759 Distribution of the number of 3'UTRs expressed per gene per sample in dendrite samples (pink)

760 and soma samples (blue). (C) Definition of ALEs and Tandem UTRs. (D) Theoretical examples

761 of genes with consistent changes in distal fraction ( $\Delta$ DF) across cells, shown as paired plots.

762 Somas and dendrites from the same original cell are shown connected by a line. Consistently

763 positive (left) or negative (right)  $\Delta DF$  indicates differentially localized isoforms between the two

764 compartments. (E) Overlap between the three sets of dendrite-localized genes (gene-level,

765 resident, and isoform-level).

766

767

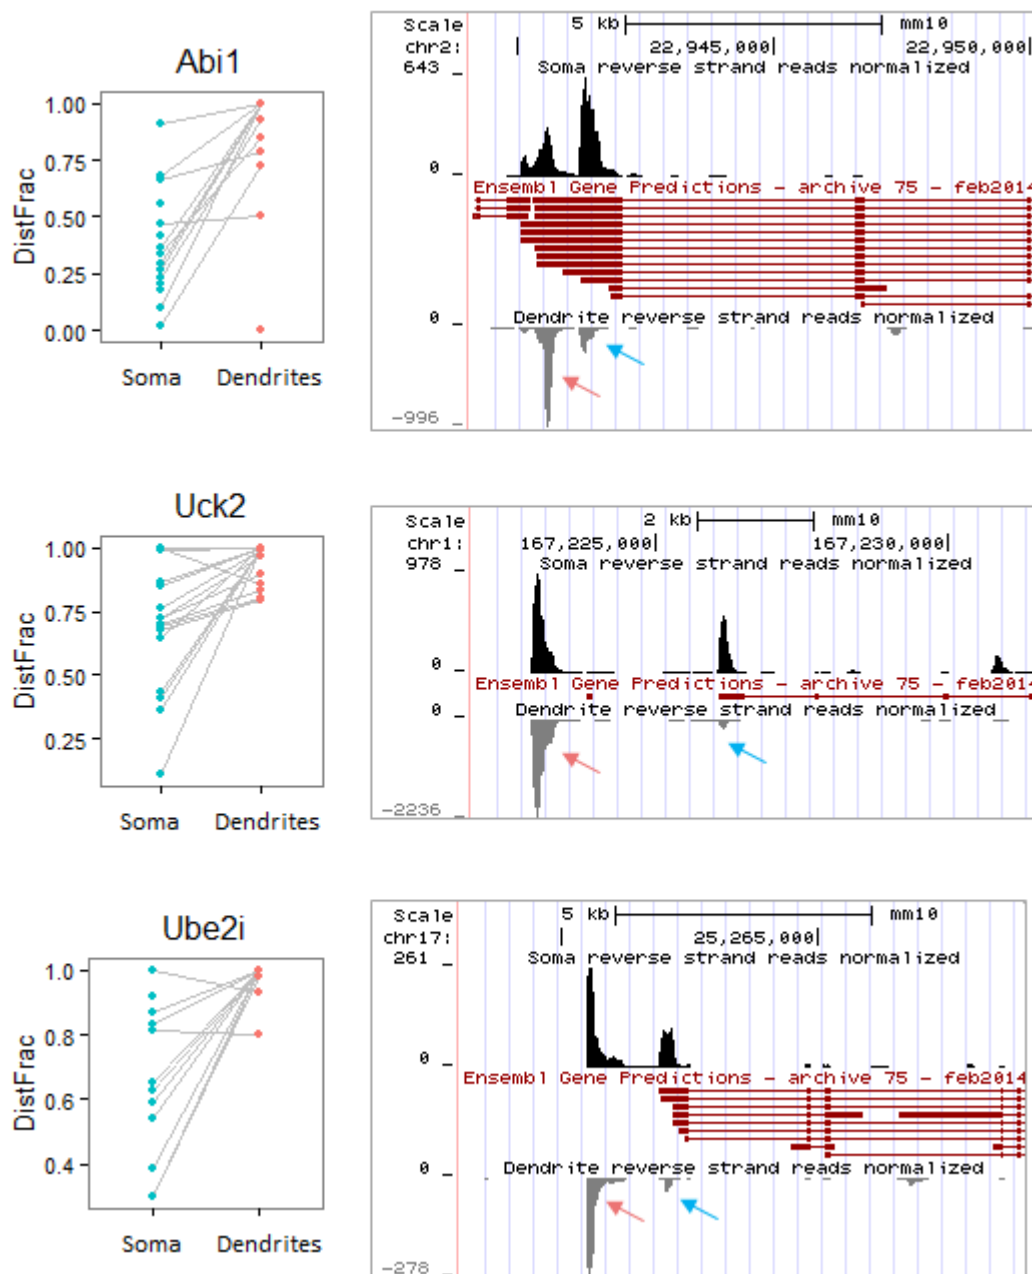

768

769 **Figure 4. Examples of genes with significantly differentially localized 3' isoforms.** Paired  
770 plots on the left show the DF for each soma-dendrite pair (connected by gray lines). The genome  
771 browser plots on the right show the read pile-ups for somas (top track; black peaks) compared to  
772 dendrites (bottom track; gray peaks; reversed orientation) relative to the annotated gene models  
773 from Ensembl (middle track; red). The dendrite-preferred 3' isoform is indicated by a pink

774 arrow, and the non-preferred isoform is indicated by a blue arrow. Note that for Uck2 and Ube2i,  
775 the dendrite-preferred 3' isoform is a new isoform from (Miura et al. 2013) and thus is not part  
776 of the Ensembl gene models. All genes shown are on the reverse strand and thus only reverse-  
777 strand reads are displayed.

778

779

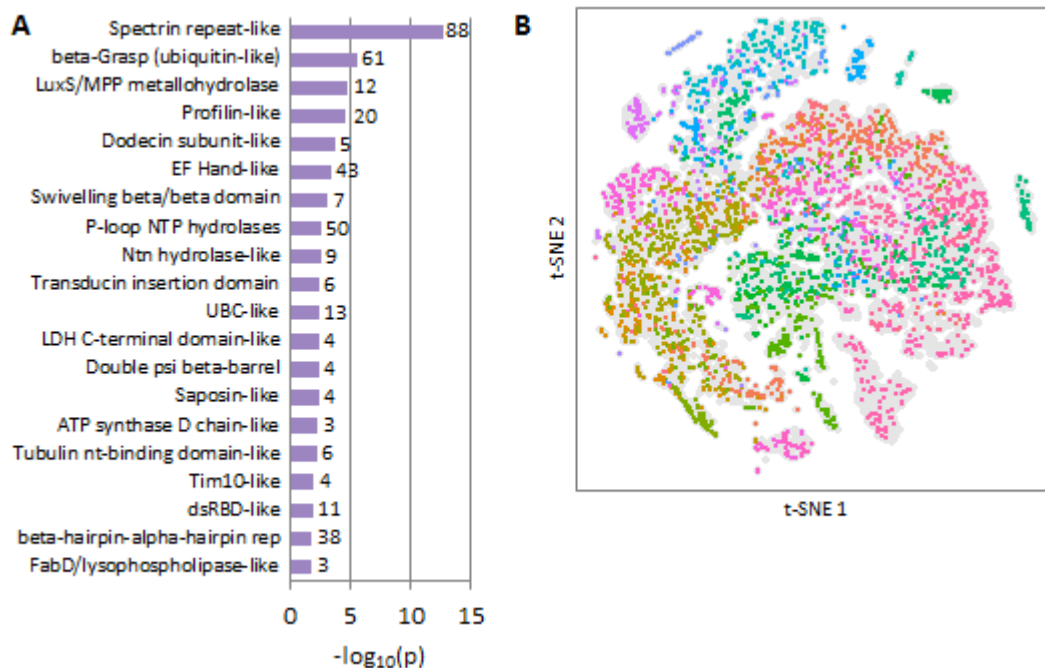

780  
781

782 **Figure 5. Protein structures of the presumptive locally-translated proteome.** (A) SCOP folds

783 enriched in the locally translated proteins compared to the neuron-expressed proteins as a whole.

784 The number of predicted domains in the local proteome for each fold is shown to the right of the

785 bar. (B) Two-dimensional representation of the protein structure space occupied by neuronally-

786 expressed protein domains. All neuronally-expressed protein domains are shown in gray in the

787 background, and locally-translated protein domains are shown in the forefront colored by

788 predicted fold (note that multiple folds may have similar colors due to the large number of folds).

789 Locally translated proteins cover most of the structure space spanned by the whole-neuron set.

790 Projection generated by t-Distributed Stochastic Neighbor Embedding (tSNE) of the PESS

791 coordinates of each input domain.

792

793

794



795 **Table 1.** Top 40 most frequently observed dendritic RNAs.

|    | <b>Gene</b> | <b># Obs</b> | <b>Refs</b> |
|----|-------------|--------------|-------------|
| 1  | Tpt1        | 6            | 1,2,4,5,6,7 |
| 2  | Rpl37       | 5            | 1,2,5,6,7   |
| 3  | Rpl4        | 5            | 1,2,4,6,7   |
| 4  | Rps29       | 5            | 1,2,5,6,7   |
| 5  | Rplp0       | 5            | 1,4,5,6,7   |
| 6  | Rpl21       | 5            | 1,2,5,6,7   |
| 7  | Arpc1b      | 5            | 1,4,5,6,7   |
| 8  | Ftl1        | 5            | 1,2,4,5,7   |
| 9  | Rps12       | 5            | 1,2,5,6,7   |
| 10 | Ppp1r9b     | 5            | 1,2,3,6,7   |
| 11 | Uba52       | 5            | 1,2,5,6,7   |
| 12 | Rpl32       | 4            | 1,5,6,7     |
| 13 | Rpl31       | 4            | 1,2,5,7     |
| 14 | Rpl15       | 4            | 1,2,5,7     |
| 15 | Rpl17       | 4            | 1,2,5,7     |
| 16 | Rpl13       | 4            | 1,2,5,7     |
| 17 | Rpl19       | 4            | 1,2,5,7     |
| 18 | Ids         | 4            | 1,2,3,7     |
| 19 | Serbp1      | 4            | 1,2,5,7     |
| 20 | Dlg4        | 4            | 1,2,3,7     |
| 21 | Hint1       | 4            | 1,2,5,7     |
| 22 | Eef2        | 4            | 1,2,4,7     |
| 23 | Rpsa        | 4            | 1,2,5,7     |
| 24 | Rps7        | 4            | 1,2,5,7     |
| 25 | Rps2        | 4            | 1,2,5,7     |
| 26 | Rps8        | 4            | 2,5,6,7     |
| 27 | Selenow     | 4            | 2,3,5,7     |
| 28 | Rpl36a      | 4            | 1,2,5,7     |
| 29 | Pabpc1      | 4            | 1,2,4,7     |
| 30 | Rps25       | 4            | 1,2,5,7     |
| 31 | Rps23       | 4            | 2,5,6,7     |
| 32 | Rps20       | 4            | 1,2,5,7     |
| 33 | Psmc3       | 4            | 1,2,5,7     |
| 34 | Arl3        | 4            | 2,5,6,7     |
| 35 | Eef1b2      | 4            | 1,2,5,7     |
| 36 | Map2        | 4            | 1,2,3,7     |
| 37 | Rplp1       | 4            | 1,2,5,7     |
| 38 | Actb        | 4            | 1,2,4,7     |
| 39 | Psd         | 4            | 1,2,3,7     |
| 40 | Rpl29       | 4            | 2,5,6,7     |

796 <sup>1</sup> (Ainsley et al. 2014)

797 <sup>2</sup> (Cajigas et al. 2012)

798 <sup>3</sup> (Lein et al. 2007)

799 <sup>4</sup> (Poon et al. 2006)

800 <sup>5</sup> (Taliaferro et al. 2016)

801 <sup>6</sup> (Zhong, Zhang, and Bloch 2006)

802 <sup>7</sup> This study
